# Supplementary material for: Phosphate Removal Efficiency and Life Cycle Assessment of Different Anode Materials in Electrocoagulation Treatment of Wastewater
Source: MDPI journal article supplement (doi:10.3390/su16093836), 2024-05-02
Supplement: s1 [file s1]

Supplementary Information for

# Phosphate Removal Efficiency and Life Cycle Assessment of Different Anode Materials in Electrocoagulation Treatment of Wastewater

Guangpu Li, Bin Zheng, Wenqing Zhang, Qiaona Liu, Mingzheng Li and Haibing Zhang \*

Faculty of Engineering, China University of Petroleum-Beijing at Karamay, Karamay 834000, China;

2021015639@st.cupk.edu.cn (G.L.); 2020015531@st.cupk.edu.cn (B.Z.);

2021015662@st.cupk.edu.cn (W.Z.);

2021015595@st.cupk.edu.cn (Q.L.); 2021015670@st.cupk.edu.cn (M.L.)

\* Correspondence: zhanghaibing@cupk.edu.cn

## Supplementary Notes

### Supplementary Note 1: SEM-EDS test data

The SEM test results are as follows:

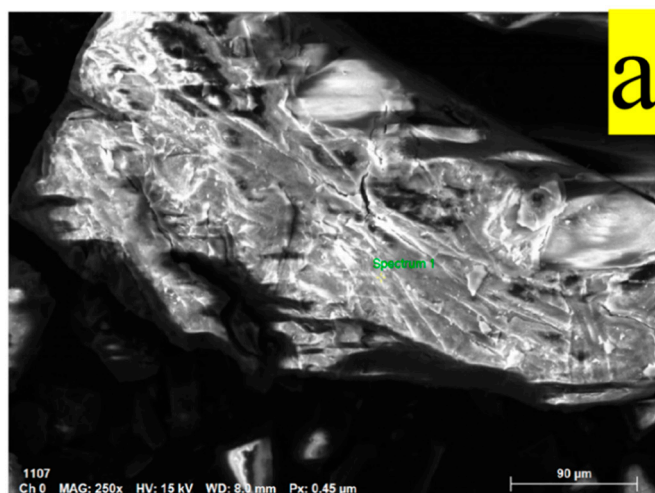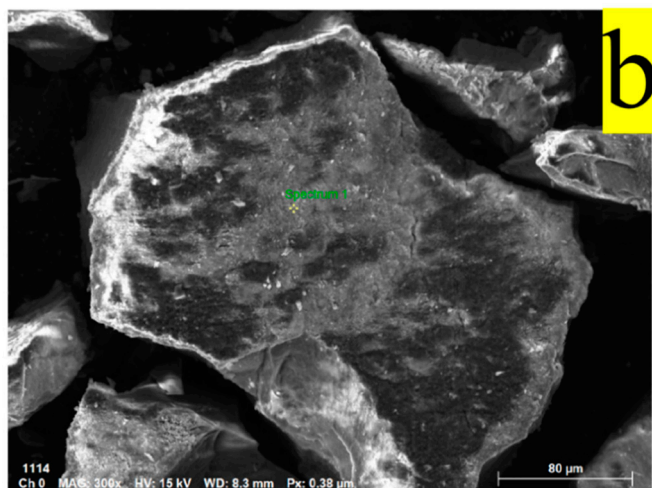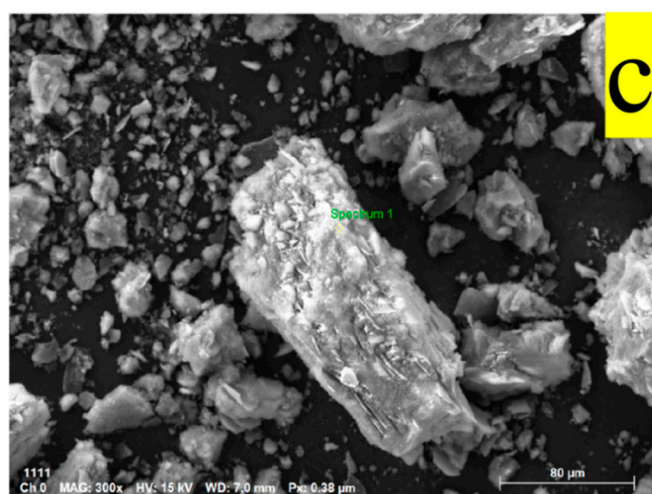

**Supplementary Figure S1** SEM test results of three metal electroflocculation products: a) aluminum, b) iron, and c) magnesium.

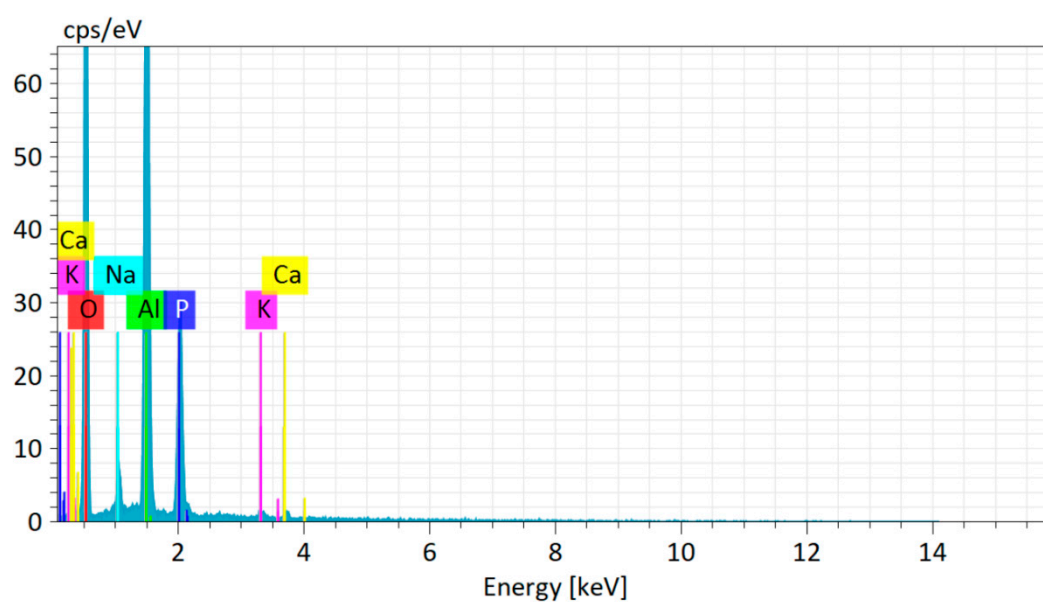

**Supplementary Figure S2** EDS results of electrocoagulation products of aluminum metal electrode.

| Spectrum   | Oxygen | Sodium | Aluminium | Phosphorus | Potassium | Calcium |
|------------|--------|--------|-----------|------------|-----------|---------|
| Spectrum 1 | 58.41  | 2.42   | 27.40     | 10.63      | 0.57      | 0.56    |

**Spectrum1**

| Element    | Atomic number | Net value | Qual-ity[%] | Normalized quality[%] | Atom[%] | Abs.error[%]<br>(1 sigma) | rel.error[%]<br>(1 sigma) |
|------------|---------------|-----------|-------------|-----------------------|---------|---------------------------|---------------------------|
| Oxygen     | 8             | 15048     | 60.86       | 58.41                 | 70.98   | 8.20                      | 13.48                     |
| Aluminium  | 13            | 18633     | 28.55       | 27.40                 | 19.75   | 1.39                      | 4.87                      |
| Phosphorus | 15            | 6288      | 11.08       | 10.63                 | 6.67    | 0.49                      | 4.46                      |
| Sodium     | 11            | 1080      | 2.52        | 2.42                  | 2.05    | 0.24                      | 9.39                      |
| Potassium  | 19            | 228       | 0.6         | 0.57                  | 0.28    | 0.09                      | 15.81                     |
| Calcium    | 20            | 183       | 0.58        | 0.56                  | 0.27    | 0.10                      | 17.37                     |
|            |               | Total:    | 104.20      | 100                   | 100     |                           |                           |

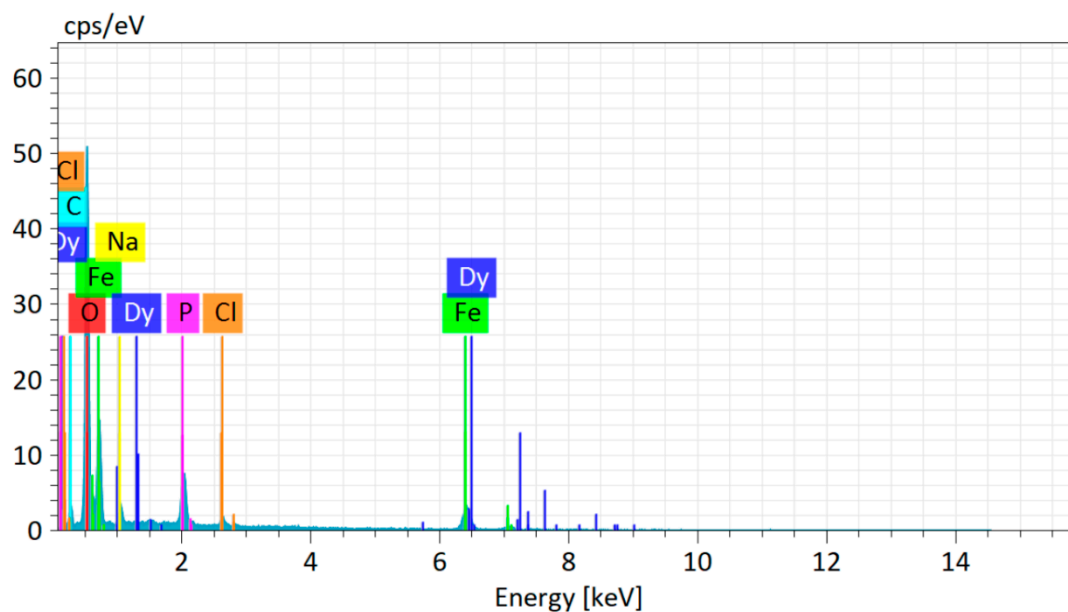

Supplementary Figure S3 EDS results of electrocoagulation products of iron metal electrodes.

| Spectrum   | Carbon | Oxygen | Sodium | Phosphorus | Chlorine | Iron  | Dysprosium |
|------------|--------|--------|--------|------------|----------|-------|------------|
| Spectrum 1 | 7.34   | 58.73  | 1.54   | 3.34       | 0.63     | 16.59 | 11.84      |

Spectrum1

| Element    | Atomic number | Net value | Quality[%] | Normalized quality[%] | Atom[%] | Abs.error[%]<br>(1 sigma) | rel.error[%]<br>(1 sigma) |
|------------|---------------|-----------|------------|-----------------------|---------|---------------------------|---------------------------|
| Oxygen     | 8             | 17535     | 73.80      | 58.73                 | 75.78   | 9.76                      | 13.22                     |
| Iron       | 26            | 2217      | 20.84      | 16.59                 | 6.13    | 0.92                      | 4.41                      |
| Dysprosium | 66            | 1005      | 14.88      | 11.84                 | 1.50    | 1.26                      | 8.47                      |
| Carbon     | 6             | 841       | 9.22       | 7.34                  | 12.61   | 2.39                      | 25.92                     |
| Phosphorus | 15            | 3709      | 4.19       | 3.34                  | 2.22    | 0.22                      | 5.16                      |
| Sodium     | 11            | 1013      | 1.93       | 1.54                  | 1.38    | 0.19                      | 10.01                     |
| Chlorine   | 17            | 571       | 0.79       | 0.63                  | 0.37    | 0.99                      | 11.20                     |
|            |               | Total:    | 125.66     | 100                   | 100     |                           |                           |

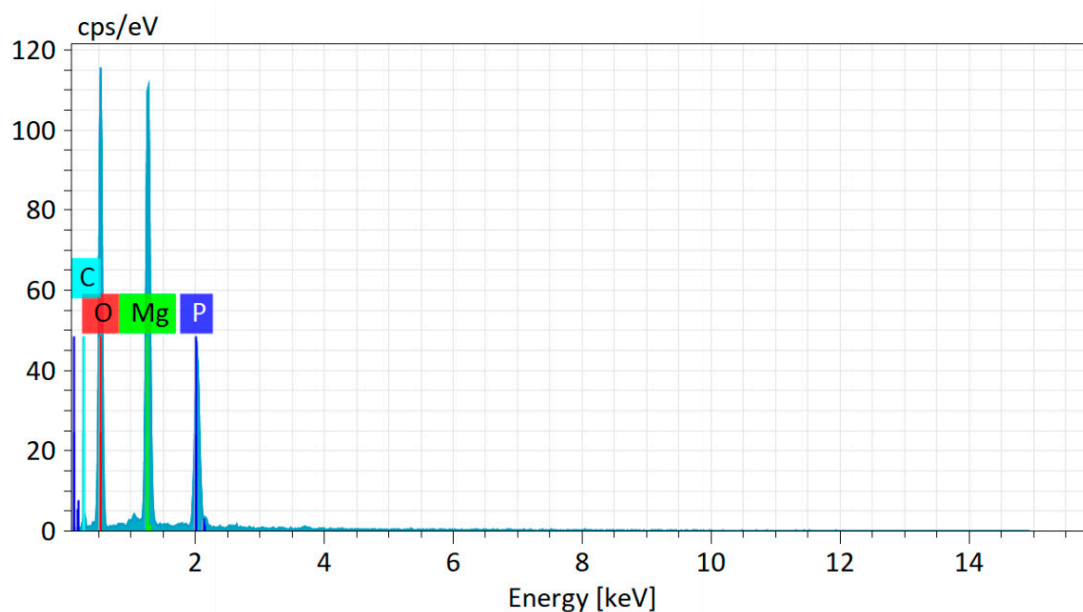

**Supplementary Figure S4** EDS results of electrocoagulation products of magnesium metal electrode.

| Spectrum   | Carbon | Oxygen | Magnesium | Phosphorus |
|------------|--------|--------|-----------|------------|
| Spectrum 1 | 6.59   | 55.35  | 25.44     | 12.61      |

**Spectrum1**

| Element    | Atomic number | Net value | Quality[%] | Normalized quality[%] | Atom[%] | Abs.error[%]<br>(1 sigma) | rel.error[%]<br>(1 sigma) |
|------------|---------------|-----------|------------|-----------------------|---------|---------------------------|---------------------------|
| Oxygen     | 8             | 14911     | 62.95      | 55.35                 | 63.33   | 8.49                      | 13.48                     |
| Magnesium  | 12            | 17620     | 28.94      | 25.44                 | 19.16   | 1.60                      | 5.52                      |
| Phosphorus | 15            | 8724      | 14.34      | 12.61                 | 7.45    | 0.61                      | 4.29                      |
| Carbon     | 6             | 453       | 7.50       | 6.59                  | 10.05   | 2.32                      | 30.93                     |
|            |               | Total:    | 125.66     | 100                   | 100     |                           |                           |

## Supplementary Note S2: Life cycle assessment

The goal and scope of the LCA study in this work are shown in Supplementary Table 1. The system boundary of LCA was set as “cradle to grave”, water emissions, and treatment effluent. Based on the experimental procedure, we assumed that the input water emissions, i.e., the simulated water configured for the experiment, were so close to the composition of the real phosphorus-containing wastewater that the difference between the two can be ignored. For the phosphorus-containing sludge produced by the experiment, in Section 3.1.4, Sludge Analysis, it is shown that the composition of the sludge can be simply summarised as follows: under the action of electricity, the phosphorus-containing sludge is the floc produced by a series of chemical reactions between the anode material and the P, O, C, and other elements in the phosphorus-containing wastewater; the LCA focuses on the "cradle to grave", and this floc is produced throughout the whole experimental process and is the "grave" product of the whole experimental process, and its impact on the environment was included in the midpoint and endpoint of the output of LCA. The function unit was set at 1m<sup>3</sup> simulated wastewater containing phosphorus and a mass distribution of 100% of treated water. Open LCA software (V.2.0.3) was used to compare and analyze the effect categories, with input inventory models obtained based on the Ecoinvent V.3.9.1 database. Potential midpoint environmental impacts were evaluated using ReCiPe 2016 Midpoint (H), and potential endpoint ecological impacts were assessed using ReCiPe 2016 (V.1.03) Endpoint (H). A total of 18 indicators were used to assess midpoint impacts: fine particulate matter formation, fossil resource scarcity, freshwater ecotoxicity, freshwater eutrophication, global warming, human carcinogenic toxicity, human non-carcinogenic toxicity, ionizing radiation, land use, marine ecotoxicity, marine eutrophication, mineral resource scarcity, ozone formation–human health, ozone formation–terrestrial ecosystems, stratospheric ozone depletion, terrestrial acidification, terrestrial ecotoxicity, and water consumption. Three indicators were used to assess endpoint impacts: total: ecosystem quality - ecosystem quality; total: human health - human health; total: natural resources - natural resources.

**Supplementary Table S1** Goal and scope definition of this LCA study

| Goal                                                                                                         |                                                                                                                                                                                                                                                                                                                                                                      |
|--------------------------------------------------------------------------------------------------------------|----------------------------------------------------------------------------------------------------------------------------------------------------------------------------------------------------------------------------------------------------------------------------------------------------------------------------------------------------------------------|
| Reason for conducting the study                                                                              | 1.This LCA looks at 18 midpoint indicators as well as 3 endpoint indicators to produce data for each evaluation indicator.<br>2.This LCA compares the midpoint and endpoint indicators of three anode electrocoagulation material for the treatment of phosphorus-containing simulated wastewater to derive the anode material with the lowest environmental impact. |
| Audience                                                                                                     | Industrial stakeholders, the research community, and the public                                                                                                                                                                                                                                                                                                      |
| Application                                                                                                  | Provide technical and theoretical support for carbon emission reduction policies and the circular economy                                                                                                                                                                                                                                                            |
| Provide technical and theoretical support for carbon emission reduction policies<br>And the circular economy | Yes, the results are to be compared and disclosed to the public through this article's publication                                                                                                                                                                                                                                                                   |
| Scope                                                                                                        |                                                                                                                                                                                                                                                                                                                                                                      |

|                                              |                                                                                                                                                                                               |
|----------------------------------------------|-----------------------------------------------------------------------------------------------------------------------------------------------------------------------------------------------|
| Product system                               | electrocoagulation treatment of wastewater                                                                                                                                                    |
| Functional unit                              | 1m <sup>3</sup> simulated wastewater containing phosphorus                                                                                                                                    |
| System boundary                              | Cradle to grave; see Fig. 3 in the main text                                                                                                                                                  |
| Allocation                                   | A mass distribution of 100 % of treated water                                                                                                                                                 |
| Assumptions                                  | Ignoring differences between simulated and actual effluents                                                                                                                                   |
| Requirements on data and quality             | Foreground data were obtained from simulation experiments and the background processes were chosen based on Ecoinvent V.3.9.1 in Open LCA 2.0.3 to cover the technological representativeness |
| LCIA methodology                             | ReCiPe 2016 Midpoint (H) for Midpoint; ReCiPe 2016 (V.1.03) Endpoint (H) for Endpoint                                                                                                         |
| <b>Impact categories</b>                     |                                                                                                                                                                                               |
| Fine particulate matter formation            | kg PM2.5 eq                                                                                                                                                                                   |
| Fossil resource scarcity                     | kg oil eq                                                                                                                                                                                     |
| Freshwater ecotoxicity                       | kg 1,4-DCB                                                                                                                                                                                    |
| Freshwater eutrophication                    | kg P eq                                                                                                                                                                                       |
| Global warming                               | kg CO <sub>2</sub> eq                                                                                                                                                                         |
| Human carcinogenic toxicity                  | kg 1,4-DCB                                                                                                                                                                                    |
| Human non-carcinogenic toxicity              | kg 1,4-DCB                                                                                                                                                                                    |
| Ionizing radiation                           | kBq Co-60 eq                                                                                                                                                                                  |
| Land use                                     | m <sup>2</sup> a crop eq                                                                                                                                                                      |
| Marine ecotoxicity                           | kg 1,4-DCB                                                                                                                                                                                    |
| Marine eutrophication                        | kg N eq                                                                                                                                                                                       |
| Mineral resource scarcity                    | kg Cu eq                                                                                                                                                                                      |
| Ozone formation, human health                | kg NO <sub>x</sub> eq                                                                                                                                                                         |
| Ozone formation, terrestrial ecosystems      | kg NO <sub>x</sub> eq                                                                                                                                                                         |
| Stratospheric ozone depletion                | kg CFC11 eq                                                                                                                                                                                   |
| Terrestrial acidification                    | kg SO <sub>2</sub> eq                                                                                                                                                                         |
| Terrestrial ecotoxicity                      | kg 1,4-DCB                                                                                                                                                                                    |
| Water consumption                            | m <sup>3</sup>                                                                                                                                                                                |
| total: ecosystem quality - ecosystem quality | species.yr                                                                                                                                                                                    |
| total: human health - human health           | DALYs                                                                                                                                                                                         |
| total: natural resources - natural resources | USD 2013                                                                                                                                                                                      |
| Report requirements                          | To present the outcome via journal publication which is openly accessible to everyone.                                                                                                        |

**Supplementary Table S2** Cradle-to-grave LCA results of Scenario 1: functional unit = 1m<sup>3</sup> simulated wastewater containing phosphorus

| Impact category                              | Reference unit           | Consumption of anodes | Consumption of electricity | Total       |
|----------------------------------------------|--------------------------|-----------------------|----------------------------|-------------|
| Fine particulate matter formation            | kg PM2.5 eq              | 0.000147498           | 0.000563628                | 0.000711126 |
| Fossil resource scarcity                     | kg oil eq                | 0.041301898           | 0.086345477                | 0.127647375 |
| Freshwater ecotoxicity                       | kg 1,4-DCB               | 0.001620257           | 0.019221067                | 0.020841324 |
| Freshwater eutrophication                    | kg P eq                  | 3.9809E-05            | 7.19503E-05                | 0.000111759 |
| Global warming                               | kg CO <sub>2</sub> eq    | 0.049634668           | 0.394559543                | 0.444194212 |
| Human carcinogenic toxicity                  | kg 1,4-DCB               | 0.002680571           | 0.0112677                  | 0.013948271 |
| Human non-carcinogenic toxicity              | kg 1,4-DCB               | 0.057796467           | 0.242822662                | 0.30061913  |
| Ionizing radiation                           | kBq Co-60 eq             | -0.001752074          | 0.050699958                | 0.048947884 |
| Land use                                     | m <sup>2</sup> a crop eq | -0.001479993          | 0.011725034                | 0.010245041 |
| Marine ecotoxicity                           | kg 1,4-DCB               | 0.002269572           | 0.024004444                | 0.026274016 |
| Marine eutrophication                        | kg N eq                  | 3.51507E-06           | 5.69705E-06                | 9.21212E-06 |
| Mineral resource scarcity                    | kg Cu eq                 | 8.87358E-05           | 3.12206E-05                | 0.000119956 |
| Ozone formation, human health                | kg NO <sub>x</sub> eq    | 0.000218048           | 0.001024677                | 0.001242725 |
| Ozone formation, terrestrial ecosystems      | kg NO <sub>x</sub> eq    | 0.000272748           | 0.001036176                | 0.001308923 |
| Stratospheric ozone depletion                | kg CFC11 eq              | 1.54061E-08           | 9.78478E-08                | 1.13254E-07 |
| Terrestrial acidification                    | kg SO <sub>2</sub> eq    | 0.000197083           | 0.001238429                | 0.001435512 |
| Terrestrial ecotoxicity                      | kg 1,4-DCB               | 0.063515541           | 1.12732021                 | 1.190835751 |
| Water consumption                            | m <sup>3</sup>           | -8.38781E-05          | 0.001338391                | 0.001254513 |
| total: ecosystem quality - ecosystem quality | species.yr               | 2.30623E-10           | 1.68239E-09                | 1.91302E-09 |
| total: human health - human health           | DALYs                    | 1.60874E-07           | 8.17331E-07                | 9.78205E-07 |
| total: natural resources - natural resources | USD 2013                 | 0.008745767           | 0.014100939                | 0.022846706 |

**Supplementary Table S3** Cradle-to-grave LCA results of Scenario 2: functional unit = 1m<sup>3</sup> simulated wastewater containing phosphorus

| Impact category                   | Reference unit        | Consumption of anodes | Consumption of electricity | Total       |
|-----------------------------------|-----------------------|-----------------------|----------------------------|-------------|
| Fine particulate matter formation | kg PM2.5 eq           | 0.000656713           | 0.000570953                | 0.001227666 |
| Fossil resource scarcity          | kg oil eq             | 0.088900593           | 0.087467668                | 0.17636826  |
| Freshwater ecotoxicity            | kg 1,4-DCB            | 0.043277603           | 0.019470874                | 0.062748477 |
| Freshwater eutrophication         | kg P eq               | 0.000201467           | 7.28854E-05                | 0.000274352 |
| Global warming                    | kg CO <sub>2</sub> eq | 0.36643869            | 0.399687445                | 0.766126135 |



|                                              |                          |              |             |              |
|----------------------------------------------|--------------------------|--------------|-------------|--------------|
| Human carcinogenic toxicity                  | kg 1,4-DCB               | -0.086041346 | 0.011414141 | -0.074627205 |
| Human non-carcinogenic toxicity              | kg 1,4-DCB               | 0.497491567  | 0.245978512 | 0.74347008   |
| Ionizing radiation                           | kBq Co-60 eq             | -0.003405037 | 0.051358882 | 0.047953844  |
| Land use                                     | m <sup>2</sup> a crop eq | 0.00229319   | 0.011877418 | 0.014170608  |
| Marine ecotoxicity                           | kg 1,4-DCB               | 0.056457546  | 0.024316419 | 0.080773964  |
| Marine eutrophication                        | kg N eq                  | 2.20045E-06  | 5.77109E-06 | 7.97154E-06  |
| Mineral resource scarcity                    | kg Cu eq                 | 0.016766075  | 3.16264E-05 | 0.016797701  |
| Ozone formation, human health                | kg NO <sub>x</sub> eq    | 0.000950026  | 0.001037995 | 0.00198802   |
| Ozone formation, terrestrial ecosystems      | kg NO <sub>x</sub> eq    | 0.001051805  | 0.001049642 | 0.002101447  |
| Stratospheric ozone depletion                | kg CFC11 eq              | 5.2684E-08   | 9.91195E-08 | 1.51803E-07  |
| Terrestrial acidification                    | kg SO <sub>2</sub> eq    | 0.000895063  | 0.001254524 | 0.002149587  |
| Terrestrial ecotoxicity                      | kg 1,4-DCB               | 0.851441375  | 1.141971452 | 1.993412827  |
| Water consumption                            | m <sup>3</sup>           | 0.002161815  | 0.001355786 | 0.003517601  |
| total: ecosystem quality - ecosystem quality | species.yr               | 1.55195E-09  | 1.70426E-09 | 3.25621E-09  |
| total: human health - human health           | DALYs                    | 5.85158E-07  | 8.27953E-07 | 1.41311E-06  |
| total: natural resources - natural resources | USD 2013                 | 0.017371228  | 0.014284202 | 0.03165543   |

**Supplementary Table S4** Cradle-to-grave LCA results of Scenario 3: functional unit = 1m<sup>3</sup> simulated wastewater containing phosphorus

| Impact category                   | Reference unit           | Consumption of anodes | Consumption of electricity | Total       |
|-----------------------------------|--------------------------|-----------------------|----------------------------|-------------|
| Fine particulate matter formation | kg PM2.5 eq              | 0.005103053           | 0.000484598                | 0.005587652 |
| Fossil resource scarcity          | kg oil eq                | 0.178864437           | 0.07423846                 | 0.253102897 |
| Freshwater ecotoxicity            | kg 1,4-DCB               | 0.030944648           | 0.016525966                | 0.047470614 |
| Freshwater eutrophication         | kg P eq                  | 0.000367905           | 6.18617E-05                | 0.000429767 |
| Global warming                    | kg CO <sub>2</sub> eq    | 0.903083543           | 0.339235983                | 1.242319526 |
| Human carcinogenic toxicity       | kg 1,4-DCB               | 0.021220531           | 0.009687788                | 0.030908319 |
| Human non-carcinogenic toxicity   | kg 1,4-DCB               | 0.68117873            | 0.20877504                 | 0.88995377  |
| Ionizing radiation                | kBq Co-60 eq             | 0.084893704           | 0.043591013                | 0.128484717 |
| Land use                          | m <sup>2</sup> a crop eq | 0.039389564           | 0.010080996                | 0.04947056  |
| Marine ecotoxicity                | kg 1,4-DCB               | 0.040541044           | 0.020638637                | 0.061179681 |
| Marine eutrophication             | kg N eq                  | 2.6532E-05            | 4.89823E-06                | 3.14302E-05 |
| Mineral resource scarcity         | kg Cu eq                 | 0.000989976           | 2.6843E-05                 | 0.001016819 |
| Ozone formation, human health     | kg NO <sub>x</sub> eq    | 0.002064544           | 0.000881001                | 0.002945545 |

|                                              |                       |             |             |             |
|----------------------------------------------|-----------------------|-------------|-------------|-------------|
| Ozone formation, terrestrial ecosystems      | kg NO <sub>x</sub> eq | 0.002157029 | 0.000890887 | 0.003047916 |
| Stratospheric ozone depletion                | kg CFC11 eq           | 1.06717E-07 | 8.4128E-08  | 1.90845E-07 |
| Terrestrial acidification                    | kg SO <sub>2</sub> eq | 0.00193729  | 0.001064781 | 0.003002072 |
| Terrestrial ecotoxicity                      | kg 1,4-DCB            | 1.36872251  | 0.969251881 | 2.337974392 |
| Water consumption                            | m <sup>3</sup>        | 0.0035234   | 0.001150727 | 0.004674128 |
| total: ecosystem quality - ecosystem quality | species.yr            | 3.87343E-09 | 1.4465E-09  | 5.31993E-09 |
| total: human health - human health           | DALYs                 | 4.28227E-06 | 7.02728E-07 | 4.985E-06   |
| total: natural resources - natural resources | USD 2013              | 0.027152715 | 0.012123762 | 0.039276476 |

**Supplementary Table S5** Cradle-to-grave LCA results of comparison of scenarios 1-3: functional unit = 1m<sup>3</sup> simulated wastewater containing phosphorus

| Impact category                              | Reference unit           | Scenario 1  | Scenario 2   | Scenario 3  |
|----------------------------------------------|--------------------------|-------------|--------------|-------------|
| Fine particulate matter formation            | kg PM2.5 eq              | 0.000711126 | 0.001227666  | 0.005587652 |
| Fossil resource scarcity                     | kg oil eq                | 0.127647375 | 0.17636826   | 0.253102897 |
| Freshwater ecotoxicity                       | kg 1,4-DCB               | 0.020841324 | 0.062748477  | 0.047470614 |
| Freshwater eutrophication                    | kg P eq                  | 0.000111759 | 0.000274352  | 0.000429767 |
| Global warming                               | kg CO <sub>2</sub> eq    | 0.444194212 | 0.766126135  | 1.242319526 |
| Human carcinogenic toxicity                  | kg 1,4-DCB               | 0.013948271 | -0.074627205 | 0.030908319 |
| Human non-carcinogenic toxicity              | kg 1,4-DCB               | 0.30061913  | 0.74347008   | 0.88995377  |
| Ionizing radiation                           | kBq Co-60 eq             | 0.048947884 | 0.047953844  | 0.128484717 |
| Land use                                     | m <sup>2</sup> a crop eq | 0.010245041 | 0.014170608  | 0.04947056  |
| Marine ecotoxicity                           | kg 1,4-DCB               | 0.026274016 | 0.080773964  | 0.061179681 |
| Marine eutrophication                        | kg N eq                  | 9.21212E-06 | 7.97154E-06  | 3.14302E-05 |
| Mineral resource scarcity                    | kg Cu eq                 | 0.000119956 | 0.016797701  | 0.001016819 |
| Ozone formation, human health                | kg NO <sub>x</sub> eq    | 0.001242725 | 0.00198802   | 0.002945545 |
| Ozone formation, terrestrial ecosystems      | kg NO <sub>x</sub> eq    | 0.001308923 | 0.002101447  | 0.003047916 |
| Stratospheric ozone depletion                | kg CFC11 eq              | 1.13254E-07 | 1.51803E-07  | 1.90845E-07 |
| Terrestrial acidification                    | kg SO <sub>2</sub> eq    | 0.001435512 | 0.002149587  | 0.003002072 |
| Terrestrial ecotoxicity                      | kg 1,4-DCB               | 1.190835751 | 1.993412827  | 2.337974392 |
| Water consumption                            | m <sup>3</sup>           | 0.001254513 | 0.003517601  | 0.004674128 |
| total: ecosystem quality - ecosystem quality | species.yr               | 1.91302E-09 | 3.25621E-09  | 5.31993E-09 |
| total: human health - human health           | DALYs                    | 9.78205E-07 | 1.41311E-06  | 4.985E-06   |
| total: natural resources - natural resources | USD 2013                 | 0.022846706 | 0.03165543   | 0.039276476 |

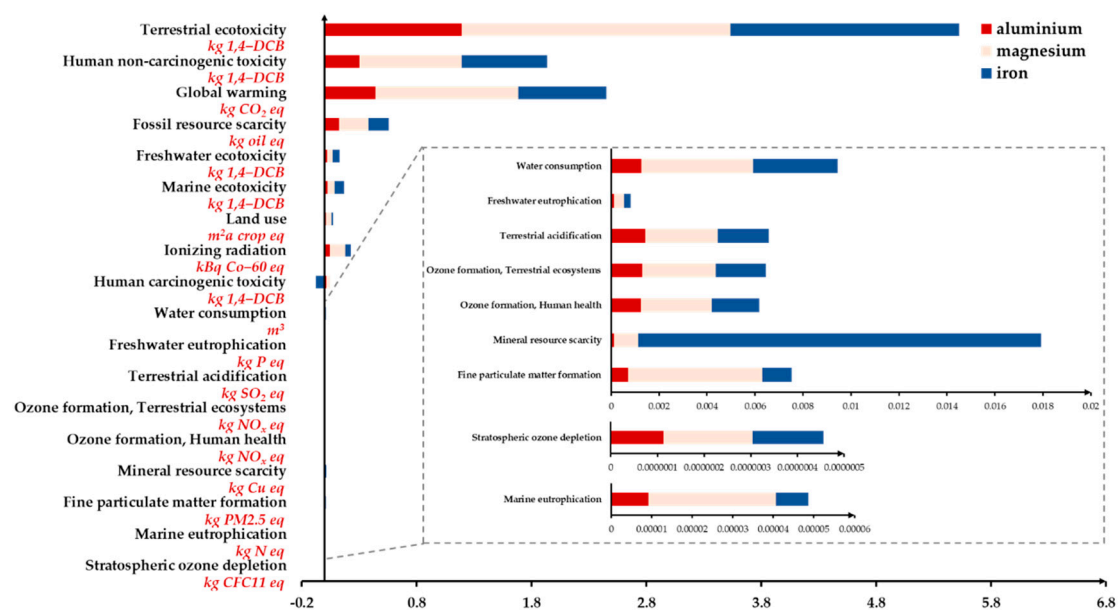

**Supplementary Figure S5** Analysis of the contribution of midpoint environmental impact indicators based on all scenarios. (Actual value.)

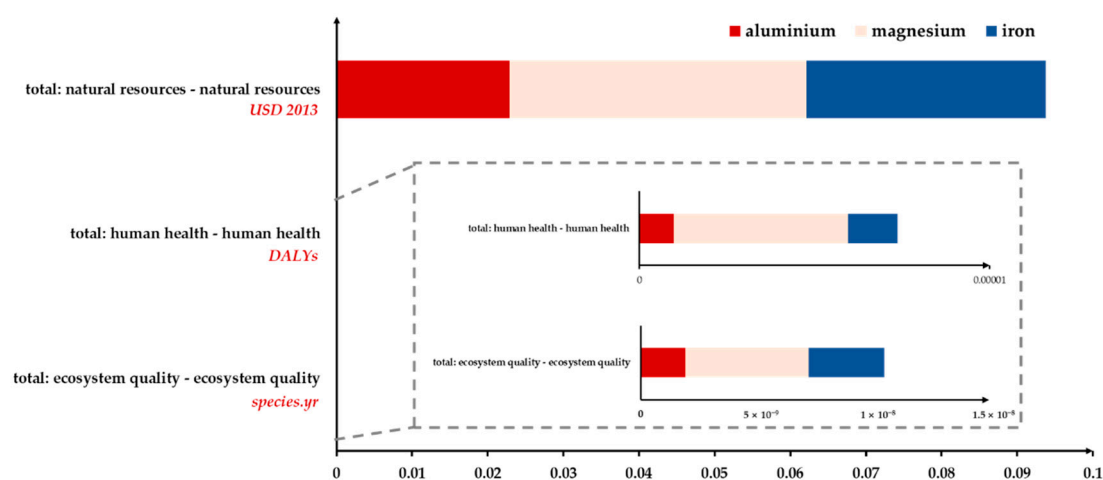

**Supplementary Figure S6** Analysis of the contribution of endpoint environmental impact indicators based on all scenarios. (Actual value.)
